# Supplementary material
Source: Springer Nature journal article supplement (https://www.springermedizin.de/resource/supplementary/12885_2009_1881_MOESM6_ESM.pdf/9461476)

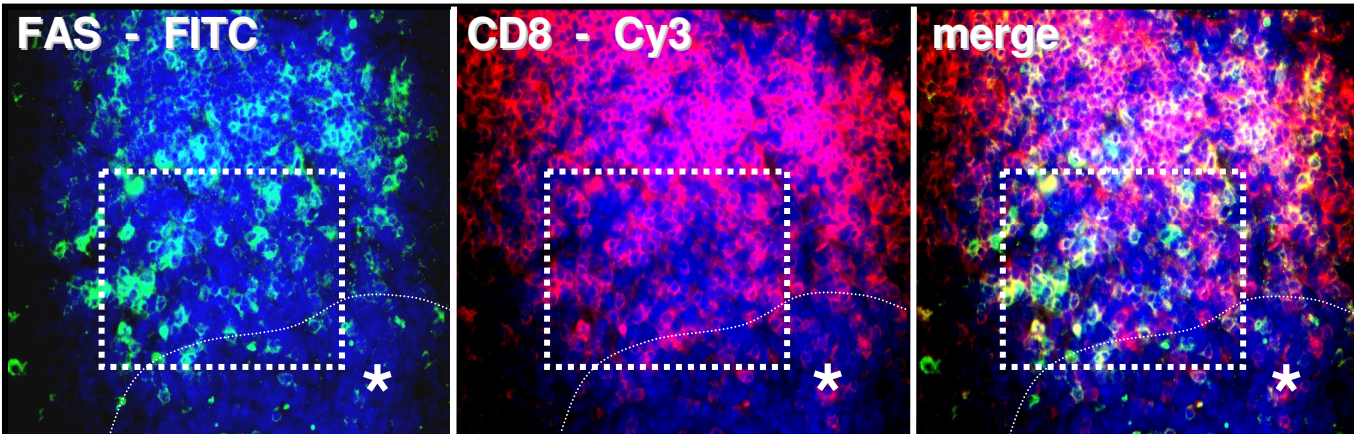

**FAS/CD8 –  
day 20**

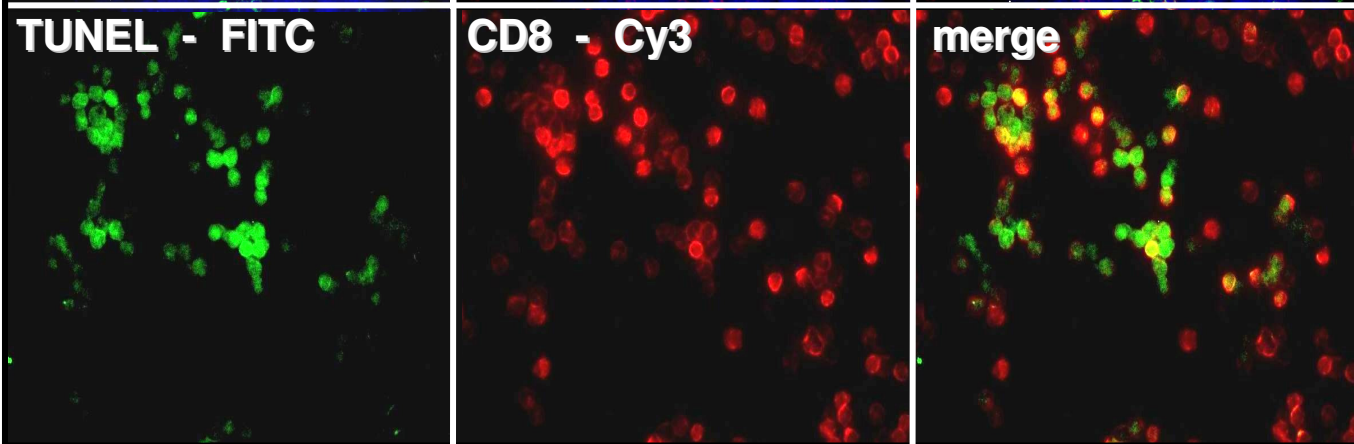

**TUNEL/CD8 –  
day 20**

Supplement: MOESM6 [file 9461476]
